# Supplementary material for: A 265-Nanometer High-Power Deep-UV Light-Emitting Diode Rapidly Inactivates SARS-CoV-2 Aerosols
Source: PubMed Central journal article supplement (PMC9044969; doi:10.1128/msphere.00941-21), 2022-03-17
Supplement: msphere.00941-21-st001.pdf [file msphere.00941-21-st001.pdf]

**Supplemental Table S1**

|                                                                                           |            | Virus survival rate (%) |        |        |       |       |
|-------------------------------------------------------------------------------------------|------------|-------------------------|--------|--------|-------|-------|
|                                                                                           |            | 10                      | 1      | 0.1    | 0.01  | 0.001 |
| 265 nm DUV-LED irradiation time (s)                                                       | Suspension | 0.040                   | 0.094  | 0.167  | 0.270 | 0.387 |
|                                                                                           | Aerosol    | 0.0043                  | 0.0074 | 0.0193 | -     | -     |
| 265 nm DUV-LED total dose (mJ/cm <sup>2</sup> )                                           | Suspension | 2.16                    | 5.08   | 9.02   | 14.58 | 20.90 |
|                                                                                           | Aerosol    | 0.23                    | 0.40   | 1.04   | -     | -     |
| The ratio of the irradiation doses required to achieve each endpoint (Suspension/Aerosol) |            | 9.39                    | 12.7   | 8.67   | -     | -     |
