# Supplementary material for: A 265-Nanometer High-Power Deep-UV Light-Emitting Diode Rapidly Inactivates SARS-CoV-2 Aerosols
Source: PubMed Central journal article supplement (PMC9044969; doi:10.1128/msphere.00941-21), 2022-03-17
Supplement: msphere.00941-21-st002.pdf [file msphere.00941-21-st002.pdf]

|                                        | Particle size distribution ( $\mu\text{m}$ ) |         |         |         |          |       |
|----------------------------------------|----------------------------------------------|---------|---------|---------|----------|-------|
|                                        | 0.3-0.5                                      | 0.5-1.0 | 1.0-2.0 | 2.0-5.0 | 5.0-10.0 | >10.0 |
| Number of particles<br>(count / 0.24L) | 76668                                        | 51980   | 22284   | 8052    | 70       | 0     |
| Percentage                             | 48.20                                        | 32.68   | 14.01   | 5.06    | 0.04     | 0.00  |
